# Supplementary material for: PDGF enhances the protective effect of adipose stem cell-derived extracellular vesicles in a model of acute hindlimb ischemia
Source: PubMed Central journal article supplement (PMC6279818; doi:10.1038/s41598-018-36143-3), 2018-12-04
Supplement: 41598_2018_36143_MOESM1_ESM.pdf [file 41598_2018_36143_MOESM1_ESM.pdf]

## **PDGF enhances the protective effect of adipose stem cell-derived extracellular vesicles in a model of acute hindlimb ischemia**

Tatiana Lopatina<sup>1</sup>, tatiana.lopatina@unito.it

Enrica Favaro<sup>1</sup>, enrica.favaro@unito.it

Cristina Grange<sup>1</sup>, cristina.grange@unito.it

Massimo Cedrino<sup>2</sup>, massimo.cedrino@unito.it

Andrea Ranghino<sup>1</sup>, andrea.ranghino@unito.it

Sergio Occhipinti<sup>1</sup>, sergio.occhipinti@unito.it

Sofia Fallo<sup>1</sup>, sofia.fallo@unito.it

Fabrizio Buffolo<sup>1</sup>, fabrizio.buffolo@gmail.com

Daria Gaykalova<sup>4</sup>, dgaykal@jhmi.edu

Maria M Zanone<sup>1</sup>, mariamaddalena.zanone@unito.it

Renato Romagnoli<sup>3</sup>, renato.romagnoli@unito.it

Giovanni Camussi<sup>1,2</sup>, giovanni.camussi@unito.it

<sup>1</sup> Department of Medical Sciences, University of Turin, Turin, Italy.

<sup>2</sup> 2i3T, Società per La Gestione Dell'incubatore Di Imprese e Per Il Trasferimento Tecnologico Dell'Università degli Studi di Torino, Scarl., Molecular Biotechnology Center (MBC), Turin, Italy

<sup>3</sup> General Surgery 2U, Liver Transplantation Center, AOU Città della Salute e della Scienza di Torino, University of Turin, Turin, Italy.

<sup>4</sup> Otolaryngology - Head and Neck Surgery, The Johns Hopkins University School of Medicine. 1550 Orleans street, Rm 5M06, CRBII, Baltimore, MD 21231

## Supplementary figure S1. Characterization of cEVs and PDGF-EVs.

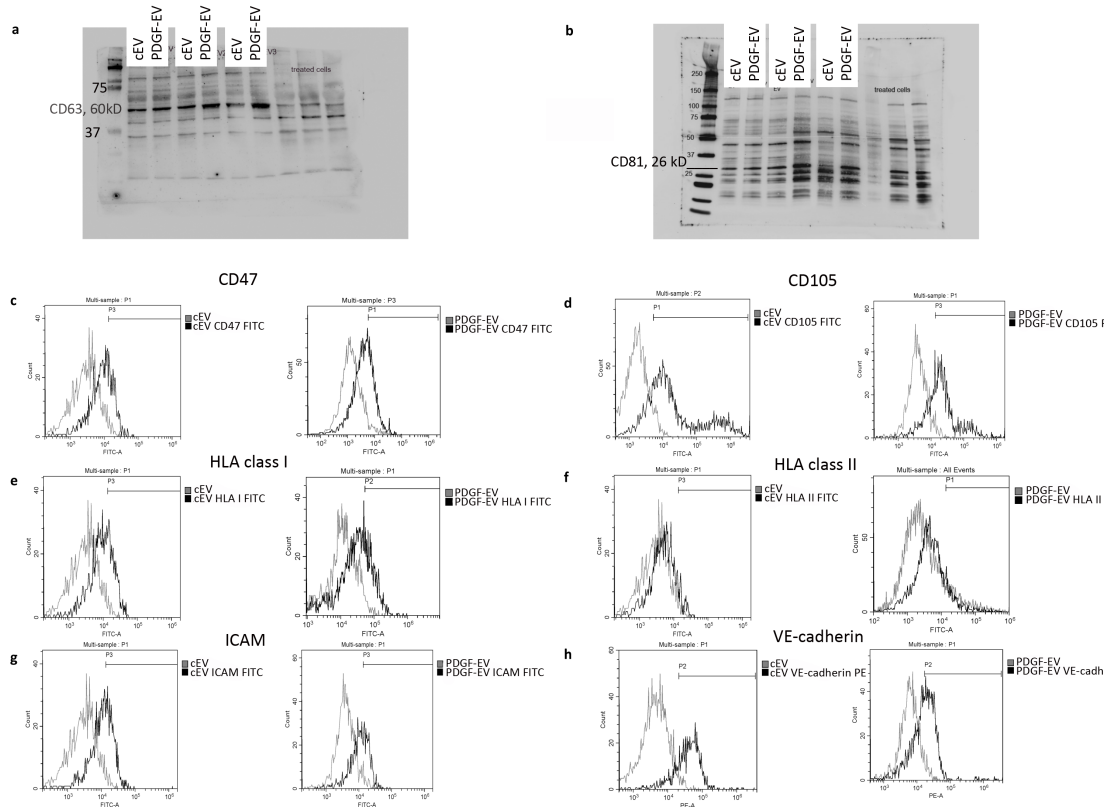

Supplementary figure S1. Characterization of cEVs and PDGF-EVs. (a, b) representative raw images of western blot analysis confirmed the expression of CD63 (a) and CD81 (b) on EVs, 10 $\mu$ g of EV protein per line; (c-h) representative images of FACS analysis of CD47 (c), CD105 (d), HLA class I (e), HLA class II (f), ICAM (g), VE-cadherin (h) expression on cEVs (left) and PDGF-EVs (right). Grey line – EVs, incubated with appropriated IgG, black line – EVs stained with appropriated fluorochrome-conjugated antibodies.

Supplementary table 1. Relative enrichment of proteins in cEVs and PDGF-EVs.

| PROTEIN         |              | PDGF-EV (1) | cEV (1) | RQ (1) | PDGF-EV (2) | cEV (2) | RQ (2) | MEAN RQ |
|-----------------|--------------|-------------|---------|--------|-------------|---------|--------|---------|
| VEGF            | NM_001025366 | 16778       | 1384    | 12.12  | 344         | 254     | 1.36   | 6.7     |
| NAP-2           | NM_002704    | 6183        | 531     | 11.65  | 63          | 55      | 1.13   | 6.4     |
| TRAIL / TNFSF10 | NM_003810    | 1977        | 353     | 5.60   | 47          | 12      | 3.77   | 4.7     |
| VEGF-D          | NM_004469    | 1518        | 189     | 8.01   | 69          | 68      | 1.01   | 4.5     |
| XEDAR           | NM_021783    | 11454       | 1588    | 7.21   | 885         | 803     | 1.10   | 4.2     |
| TROY / TNFRSF19 | NM_018647    | 857         | 237     | 3.61   | 70          | 16      | 4.30   | 4.0     |
| TLR4            | NM_138554    | 431         | 115     | 3.73   | 51          | 14      | 3.60   | 3.7     |
| CCR7            | NM_001838    | 270         | 64      | 4.20   | 44          | 14      | 3.11   | 3.7     |
| I-TAC / CXCL11  | NM_005409    | 18080       | 3566    | 5.07   | 189         | 88      | 2.15   | 3.6     |
| S100A10         | NM_002966    | 1436        | 269     | 5.35   | 63          | 37      | 1.70   | 3.5     |
| TGF-beta RIII   | NM_003243    | 816         | 234     | 3.48   | 25          | 8       | 3.25   | 3.4     |
| RANTES          | NM_002985    | 1289        | 243     | 5.30   | 48          | 39      | 1.23   | 3.3     |
| CK-MB           | NM_001823    | 909         | 167     | 5.40   | 141         | 127     | 1.11   | 3.3     |

|                                  |              |       |      |      |      |      |      |     |
|----------------------------------|--------------|-------|------|------|------|------|------|-----|
| <b>VEGF-C</b>                    | NM_005429    | 5105  | 931  | 5.48 | 297  | 296  | 1.00 | 3.2 |
| <b>VEGF R2 (KDR)</b>             | NM_002253    | 1544  | 306  | 5.04 | 59   | 46   | 1.29 | 3.2 |
| <b>CD30 Ligand / TNFSF8</b>      | NM_001244    | 12240 | 2670 | 4.58 | 105  | 66   | 1.60 | 3.1 |
| <b>C3a</b>                       | NM_000064    | 2229  | 494  | 4.50 | 284  | 184  | 1.54 | 3.0 |
| <b>IL-23</b>                     | NM_016584    | 2570  | 835  | 3.08 | 158  | 54   | 2.92 | 3.0 |
| <b>Siglec-5/CD170</b>            | NM_003830    | 2624  | 557  | 4.71 | 187  | 177  | 1.05 | 2.9 |
| <b>PDGF-D</b>                    | NM_025208    | 1642  | 363  | 4.53 | 37   | 34   | 1.09 | 2.8 |
| <b>TREM-1</b>                    | NM_018643    | 2422  | 571  | 4.24 | 158  | 115  | 1.38 | 2.8 |
| <b>TIMP-3</b>                    | NM_000362    | 4416  | 1001 | 4.41 | 260  | 229  | 1.13 | 2.8 |
| <b>NCAM-1 / CD56</b>             | NM_181351    | 1502  | 377  | 3.98 | 64   | 42   | 1.54 | 2.8 |
| <b>NM23-H1/H2</b>                | NM_000269    | 323   | 76   | 4.30 | 48   | 42   | 1.13 | 2.7 |
| <b>Orexin A</b>                  | NM_001525    | 2430  | 602  | 4.03 | 49   | 37   | 1.32 | 2.7 |
| <b>TL1A / TNFSF15</b>            | NM_005118    | 1460  | 354  | 4.12 | 41   | 37   | 1.12 | 2.6 |
| <b>TGFb1</b>                     | NM_000660    | 66935 | 1632 | 4.10 | 4815 | 4532 | 1.06 | 2.5 |
| <b>MICA</b>                      | NM_001177519 | 1291  | 354  | 3.65 | 72   | 50   | 1.45 | 2.5 |
| <b>Insulysin / IDE</b>           | NM_004969    | 1341  | 348  | 3.86 | 65   | 57   | 1.15 | 2.5 |
| <b>Thrombopoietin (TPO)</b>      | NM_000460    | 1001  | 275  | 3.63 | 59   | 44   | 1.35 | 2.5 |
| <b>Neurturin</b>                 | NM_004558    | 846   | 272  | 3.11 | 68   | 37   | 1.85 | 2.5 |
| <b>sFRP-1</b>                    | NM_003012    | 1035  | 338  | 3.06 | 26   | 14   | 1.89 | 2.5 |
| <b>TRANCE</b>                    | NM_033012    | 1458  | 378  | 3.85 | 105  | 102  | 1.03 | 2.4 |
| <b>MDC</b>                       | NM_002990    | 1518  | 403  | 3.77 | 41   | 38   | 1.07 | 2.4 |
| <b>MMP-10</b>                    | NM_002425    | 1556  | 414  | 3.76 | 92   | 89   | 1.04 | 2.4 |
| <b>TLR2</b>                      | NM_003264    | 1406  | 408  | 3.45 | 36   | 27   | 1.34 | 2.4 |
| <b>MMP-9</b>                     | NM_004994    | 3565  | 976  | 3.65 | 206  | 187  | 1.10 | 2.4 |
| <b>NeuroD1</b>                   | NM_002500    | 1163  | 314  | 3.71 | 41   | 40   | 1.02 | 2.4 |
| <b>I-309</b>                     | NM_002981    | 1160  | 379  | 3.06 | 60   | 36   | 1.65 | 2.4 |
| <b>IL-21 R</b>                   | NM_021798    | 980   | 309  | 3.17 | 38   | 25   | 1.52 | 2.3 |
| <b>Ubiquitin+1</b>               | NM_018955    | 34834 | 9751 | 3.57 | 3785 | 3422 | 1.11 | 2.3 |
| <b>Factor XIII B</b>             | NM_001994    | 637   | 240  | 2.70 | 101  | 57   | 1.76 | 2.2 |
| <b>Lymphotoxin beta / TNFSF3</b> | NM_009588    | 715   | 254  | 2.82 | 63   | 39   | 1.61 | 2.2 |
| <b>LDL R</b>                     | NM_000527    | 2626  | 790  | 3.30 | 149  | 146  | 1.02 | 2.2 |
| <b>IL-13 R alpha 2</b>           | NM_000640    | 802   | 321  | 2.50 | 53   | 30   | 1.80 | 2.1 |
| <b>Cytokeratin 19</b>            | NM_002276    | 3935  | 2286 | 1.70 | 5141 | 1986 | 2.59 | 2.1 |
| <b>MMP-7</b>                     | NM_002423    | 2463  | 840  | 2.93 | 141  | 105  | 1.35 | 2.1 |
| <b>Progranulin</b>               | NM_002087    | 3801  | 1216 | 3.12 | 115  | 104  | 1.11 | 2.1 |
| <b>MMP-14</b>                    | NM_004995    | 1967  | 625  | 3.15 | 335  | 310  | 1.08 | 2.1 |
| <b>CD71</b>                      | NM_001128148 | 15834 | 6821 | 2.30 | 2998 | 1579 | 1.90 | 2.1 |
| <b>Cystatin A</b>                | NM_005213    | 985   | 317  | 3.10 | 77   | 70   | 1.10 | 2.1 |
| <b>APC</b>                       | NM_000038    | 847   | 381  | 2.20 | 612  | 311  | 1.96 | 2.1 |
| <b>Kremen-2</b>                  | NM_024507    | 2631  | 842  | 3.12 | 154  | 153  | 1.00 | 2.1 |
| <b>IP-10</b>                     | NM_001565    | 1088  | 362  | 3.01 | 109  | 98   | 1.10 | 2.1 |
| <b>Cathepsin D</b>               | NM_001909    | 802   | 257  | 3.10 | 71   | 71   | 1.01 | 2.1 |
| <b>BMP-9</b>                     | NM_016204    | 1670  | 566  | 3.00 | 177  | 165  | 1.07 | 2.0 |
| <b>CD74</b>                      | NM_004355    | 860   | 319  | 2.70 | 126  | 92   | 1.37 | 2.0 |
| <b>CD38</b>                      | NM_001775    | 973   | 444  | 2.20 | 152  | 82   | 1.86 | 2.0 |
| <b>IL-19</b>                     | NM_153758    | 11943 | 4143 | 2.88 | 187  | 166  | 1.13 | 2.0 |
| <b>E-Cadherin</b>                | NM_004360    | 497   | 169  | 2.90 | 83   | 75   | 1.11 | 2.0 |

|                       |              |       |      |      |      |      |      |     |
|-----------------------|--------------|-------|------|------|------|------|------|-----|
| <b>BDNF</b>           | NM_170735    | 1811  | 763  | 2.37 | 167  | 107  | 1.56 | 2.0 |
| <b>Calsyntenin-1</b>  | NM_001009566 | 737   | 262  | 2.80 | 84   | 74   | 1.13 | 2.0 |
| <b>MIF</b>            | NM_002415    | 2365  | 858  | 2.76 | 102  | 88   | 1.16 | 2.0 |
| <b>Ceruloplasmin</b>  | NM_000096    | 1606  | 845  | 1.90 | 423  | 211  | 2.00 | 2.0 |
| IL-24                 | NM_006850    | 922   | 356  | 2.59 | 61   | 47   | 1.30 | 1.9 |
| OX40 Ligand / TNFSF4  | NM_003326    | 1013  | 358  | 2.83 | 97   | 95   | 1.02 | 1.9 |
| IL-23 R               | NM_144701    | 1470  | 539  | 2.73 | 92   | 82   | 1.12 | 1.9 |
| LRG1                  | NM_052972    | 11893 | 4248 | 2.80 | 919  | 877  | 1.05 | 1.9 |
| IL-1 R9               | NM_017416    | 928   | 383  | 2.42 | 56   | 39   | 1.42 | 1.9 |
| gamma-Thrombin        | NM_000506    | 133   | 49   | 2.70 | 98   | 86   | 1.13 | 1.9 |
| IGFBP-5               | NM_000599    | 1008  | 371  | 2.70 | 82   | 73   | 1.12 | 1.9 |
| MIP-1a                | NM_002983    | 1211  | 446  | 2.71 | 101  | 91   | 1.10 | 1.9 |
| Nanog                 | NM_024865    | 785   | 296  | 2.70 | 70   | 64   | 1.10 | 1.9 |
| ADAMTS-18             | NM_199355    | 216   | 81   | 2.70 | 86   | 79   | 1.09 | 1.9 |
| DCBLD2                | NM_080927    | 906   | 375  | 2.40 | 84   | 60   | 1.38 | 1.9 |
| IL-13 R alpha 1       | NM_001560    | 2342  | 886  | 2.64 | 362  | 334  | 1.09 | 1.9 |
| BNIP2                 | NM_004330    | 1897  | 887  | 2.10 | 636  | 400  | 1.59 | 1.8 |
| MMP-11 /Stromelysin-3 | NM_005940    | 3585  | 1431 | 2.51 | 427  | 364  | 1.17 | 1.8 |
| CFHR2                 | NM_005666    | 711   | 295  | 2.40 | 79   | 62   | 1.28 | 1.8 |
| GMNN                  | NM_015895    | 5478  | 2583 | 2.10 | 806  | 517  | 1.56 | 1.8 |
| ApoE3                 | NM_000041    | 844   | 352  | 2.40 | 99   | 79   | 1.25 | 1.8 |
| Aldolase B            | NM_000035    | 683   | 268  | 2.50 | 91   | 79   | 1.15 | 1.8 |
| ApoM                  | NM_019101    | 826   | 331  | 2.50 | 82   | 71   | 1.14 | 1.8 |
| LIMPII                | NM_001204255 | 998   | 387  | 2.60 | 95   | 92   | 1.03 | 1.8 |
| BMPR-IB / ALK-6       | NM_001203    | 248   | 183  | 1.35 | 88   | 39   | 2.28 | 1.8 |
| LBP                   | NM_004139    | 1052  | 468  | 2.25 | 69   | 50   | 1.37 | 1.8 |
| MMP-13                | NM_002427    | 1530  | 587  | 2.61 | 74   | 73   | 1.01 | 1.8 |
| IL-7                  | NM_000880    | 17003 | 7546 | 2.25 | 5362 | 3970 | 1.35 | 1.8 |
| Pro-Cathepsin B       | NM_147780    | 1185  | 466  | 2.50 | 69   | 62   | 1.10 | 1.8 |
| Btk                   | NM_000061    | 1508  | 792  | 1.90 | 541  | 318  | 1.70 | 1.8 |
| IL-7 R alpha          | NM_002185    | 1075  | 502  | 2.14 | 78   | 54   | 1.45 | 1.8 |
| BMX                   | NM_001712    | 1393  | 639  | 2.20 | 284  | 205  | 1.39 | 1.8 |
| CCR5                  | NM_000579    | 921   | 386  | 2.39 | 92   | 77   | 1.20 | 1.8 |
| Erythropoietin R      | NM_000121    | 735   | 292  | 2.50 | 75   | 70   | 1.08 | 1.8 |
| PDGF R alpha          | NM_006206    | 15002 | 6054 | 2.48 | 198  | 180  | 1.10 | 1.8 |
| Aldolase C            | NM_005165    | 2326  | 1122 | 2.10 | 405  | 277  | 1.46 | 1.8 |
| CPN2                  | NM_000129    | 2839  | 1466 | 1.90 | 1065 | 641  | 1.66 | 1.8 |
| CA 15-3               | NM_002456    | 579   | 488  | 1.20 | 926  | 392  | 2.36 | 1.8 |
| DMP-1                 | NM_001079911 | 408   | 162  | 2.50 | 56   | 54   | 1.04 | 1.8 |
| Glypican 5            | NM_004466    | 17063 | 9823 | 1.74 | 1732 | 964  | 1.80 | 1.8 |
| Serpin 11             | NM_001122752 | 743   | 346  | 2.10 | 47   | 33   | 1.43 | 1.8 |
| CD36                  | NM_001001547 | 260   | 111  | 2.30 | 235  | 192  | 1.23 | 1.8 |
| APN                   | NM_001150    | 984   | 400  | 2.50 | 154  | 151  | 1.02 | 1.8 |
| EphA8                 | NM_020526    | 1219  | 480  | 2.50 | 205  | 202  | 1.01 | 1.8 |
| Alpha Lactalbumin     | NM_002289    | 1300  | 849  | 1.50 | 590  | 294  | 2.01 | 1.8 |
| Calreticulin          | NM_004343    | 988   | 413  | 2.40 | 113  | 102  | 1.10 | 1.8 |
| FGF-21                | NM_019113    | 659   | 360  | 1.83 | 61   | 37   | 1.67 | 1.8 |

|                          |                         |      |      |      |      |      |      |     |
|--------------------------|-------------------------|------|------|------|------|------|------|-----|
| ADAMTS-1                 | NM_006988               | 1037 | 574  | 1.80 | 231  | 136  | 1.70 | 1.8 |
| PYY                      | NM_004160               | 1187 | 520  | 2.30 | 81   | 67   | 1.20 | 1.7 |
| Caspase-3                | NM_004346               | 639  | 268  | 2.40 | 78   | 72   | 1.09 | 1.7 |
| S100 A8/A9               | NM_002964.<br>NM_002965 | 2910 | 1187 | 2.45 | 384  | 373  | 1.03 | 1.7 |
| COCO                     | NM_152654               | 849  | 351  | 2.40 | 78   | 74   | 1.06 | 1.7 |
| CA 125                   | NM_024690               | 1049 | 761  | 1.40 | 1254 | 614  | 2.04 | 1.7 |
| TRPM7                    | NM_017672               | 496  | 212  | 2.30 | 49   | 43   | 1.14 | 1.7 |
| EpCAM                    | NM_002354               | 659  | 280  | 2.40 | 80   | 77   | 1.04 | 1.7 |
| ESAM                     | NM_138961               | 865  | 372  | 2.30 | 122  | 107  | 1.13 | 1.7 |
| Endothelin Receptor<br>A | NM_001166055            | 810  | 386  | 2.10 | 245  | 185  | 1.33 | 1.7 |
| Galectin-3               | NM_002306               | 1340 | 570  | 2.35 | 227  | 214  | 1.06 | 1.7 |
| GPX3                     | NM_002084               | 857  | 352  | 2.40 | 74   | 74   | 1.00 | 1.7 |
| IL-28A                   | NM_172138               | 987  | 444  | 2.23 | 97   | 82   | 1.17 | 1.7 |
| MMP-24 / MT5-MMP         | NM_006690               | 1555 | 692  | 2.25 | 453  | 397  | 1.14 | 1.7 |
| CRTAM                    | NM_019604               | 879  | 379  | 2.30 | 207  | 194  | 1.07 | 1.7 |
| IL-29                    | NM_172140               | 935  | 423  | 2.21 | 73   | 63   | 1.15 | 1.7 |
| Kallikrein 11            | NM_006853               | 771  | 335  | 2.30 | 99   | 96   | 1.02 | 1.7 |
| Neuropeptide Y           | NM_000905               | 481  | 206  | 2.30 | 58   | 57   | 1.02 | 1.7 |
| Annexin A7               | NM_001156               | 957  | 425  | 2.30 | 82   | 81   | 1.01 | 1.7 |
| HB-EGF                   | NM_001945               | 962  | 521  | 1.84 | 73   | 50   | 1.47 | 1.7 |
| CHI3L1                   | NM_001276               | 4053 | 2020 | 2.00 | 1859 | 1474 | 1.26 | 1.6 |
| ADAMTS-19                | NM_133638               | 755  | 456  | 1.70 | 508  | 328  | 1.55 | 1.6 |
| CD44                     | NM_000610               | 613  | 294  | 2.10 | 198  | 175  | 1.13 | 1.6 |
| GPX1                     | NM_000581               | 831  | 372  | 2.20 | 97   | 94   | 1.03 | 1.6 |
| sFRP-3                   | NM_001463               | 825  | 396  | 2.08 | 50   | 44   | 1.14 | 1.6 |
| Hepcidin                 | NM_021175               | 1047 | 468  | 2.20 | 98   | 96   | 1.01 | 1.6 |
| C5/C5a                   | NM_001735               | 1579 | 764  | 2.10 | 146  | 135  | 1.09 | 1.6 |
| ADAMTS-4                 | NM_005099               | 640  | 298  | 2.10 | 169  | 156  | 1.08 | 1.6 |
| ICAM-2                   | NM_000873               | 1009 | 484  | 2.09 | 55   | 50   | 1.09 | 1.6 |
| S100A6                   | NM_002964               | 3154 | 1687 | 1.90 | 722  | 573  | 1.26 | 1.6 |
| INSL3                    | NM_014215               | 1162 | 547  | 2.10 | 388  | 384  | 1.01 | 1.6 |
| p21                      | NM_078467               | 2852 | 1494 | 1.90 | 729  | 613  | 1.19 | 1.5 |
| IL-27                    | NM_145659               | 1624 | 796  | 2.04 | 116  | 113  | 1.03 | 1.5 |
| IGF-I                    |                         | 1039 | 515  | 2.02 | 91   | 87   | 1.05 | 1.5 |
| IL-2 R alpha             | NM_000417               | 2277 | 1723 | 1.32 | 199  | 114  | 1.74 | 1.5 |
| MCP-4 / CCL13            | NM_005408               | 384  | 195  | 1.97 | 112  | 104  | 1.07 | 1.5 |
| HSP27                    | NM_001540               | 917  | 448  | 2.00 | 150  | 145  | 1.04 | 1.5 |
| Layilin                  | NM_178834               | 1550 | 789  | 2.00 | 168  | 166  | 1.01 | 1.5 |
| Cathepsin B              | NM_147780               | 3197 | 1592 | 2.00 | 142  | 140  | 1.01 | 1.5 |
| EphA6                    | NM_001080448            | 3312 | 1771 | 1.90 | 387  | 352  | 1.10 | 1.5 |
| IL-17C                   | NM_013278               | 1894 | 981  | 1.93 | 98   | 92   | 1.07 | 1.5 |
| IL-17B R                 | NM_172234               | 1050 | 544  | 1.93 | 186  | 177  | 1.05 | 1.5 |
| IGFBP-rp1 / IGFBP-7      | NM_001553               | 4473 | 2397 | 1.87 | 181  | 163  | 1.11 | 1.5 |
| EphB4                    | NM_004444               | 567  | 321  | 1.80 | 78   | 68   | 1.14 | 1.5 |
| ADAMTS-L2                | NM_014244               | 284  | 155  | 1.80 | 119  | 105  | 1.14 | 1.5 |
| FER                      | NM_005246               | 1821 | 975  | 1.90 | 249  | 243  | 1.03 | 1.5 |
| EGF R / ErbB1            | NM_005228               | 2831 | 1747 | 1.62 | 165  | 127  | 1.30 | 1.5 |

|                    |                                          |       |       |      |       |       |      |     |
|--------------------|------------------------------------------|-------|-------|------|-------|-------|------|-----|
| CRP                | NM_000567                                | 1382  | 907   | 1.50 | 634   | 447   | 1.42 | 1.5 |
| Integrin alpha V   | NM_002210                                | 1699  | 924   | 1.80 | 1166  | 1053  | 1.11 | 1.5 |
| IL-9               | NM_000590                                | 3684  | 2273  | 1.62 | 504   | 395   | 1.28 | 1.4 |
| Tyk2               | NM_003331                                | 340   | 191   | 1.80 | 37    | 34    | 1.10 | 1.4 |
| FLRG               | NM_005860                                | 571   | 365   | 1.56 | 60    | 45    | 1.33 | 1.4 |
| 6Ckine             | NM_002989                                | 781   | 516   | 1.51 | 136   | 98    | 1.38 | 1.4 |
| GPBB               | NM_002862                                | 1295  | 796   | 1.60 | 407   | 325   | 1.25 | 1.4 |
| ApoA4              | NM_000482                                | 1499  | 1055  | 1.40 | 567   | 390   | 1.45 | 1.4 |
| Furin              | NM_002569                                | 127   | 77    | 1.60 | 131   | 106   | 1.24 | 1.4 |
| 11b-HSD1           | NM_005525                                | 500   | 285   | 1.80 | 183   | 180   | 1.01 | 1.4 |
| CNTF               | NM_000614                                | 11569 | 8121  | 1.42 | 1018  | 748   | 1.36 | 1.4 |
| IL-17              | NM_002190                                | 3687  | 2290  | 1.61 | 679   | 581   | 1.17 | 1.4 |
| C2                 | NM_000063                                | 2686  | 1709  | 1.60 | 828   | 707   | 1.17 | 1.4 |
| C-peptide          | NM_000207                                | 1877  | 1630  | 1.20 | 1138  | 746   | 1.52 | 1.4 |
| Endorphin Beta     | NM_000939                                | 746   | 460   | 1.60 | 287   | 258   | 1.11 | 1.4 |
| Fetuin B           | NM_014375                                | 121   | 84    | 1.40 | 96    | 74    | 1.31 | 1.4 |
| Fyn                | NM_002037                                | 2165  | 1311  | 1.70 | 314   | 312   | 1.00 | 1.4 |
| ACK1               | NM_005781                                | 3091  | 1903  | 1.60 | 393   | 359   | 1.10 | 1.3 |
| IFN-beta           | NM_002176                                | 1344  | 912   | 1.47 | 124   | 101   | 1.22 | 1.3 |
| SOST               | NM_025237                                | 680   | 413   | 1.60 | 48    | 44    | 1.09 | 1.3 |
| HCC-4 / CCL16      | NM_004590                                | 960   | 628   | 1.53 | 107   | 94    | 1.14 | 1.3 |
| EG-VEGF / PK1      | NM_032414                                | 1107  | 1102  | 1.00 | 91    | 55    | 1.66 | 1.3 |
| IL-1 R8            | NM_014271                                | 4196  | 2576  | 1.63 | 958   | 935   | 1.03 | 1.3 |
| Angiopoietin-4     | NM_015985                                | 317   | 275   | 1.15 | 100   | 68    | 1.47 | 1.3 |
| MCP-2              | NM_005623                                | 809   | 529   | 1.53 | 128   | 121   | 1.06 | 1.3 |
| IGFBP-1            | NM_001013029                             | 916   | 585   | 1.57 | 38    | 38    | 1.02 | 1.3 |
| HCR / CRAM-A/B     | NM_019052                                | 2101  | 1489  | 1.41 | 398   | 344   | 1.16 | 1.3 |
| GRO                | NM_001511.<br>NM_0020893.<br>NM_0020902. | 32778 | 21903 | 1.50 | 9507  | 9128  | 1.04 | 1.3 |
| Beta Defensin 4    | NM_004942                                | 365   | 280   | 1.30 | 176   | 144   | 1.22 | 1.3 |
| BCMA / TNFRSF17    | NM_001192                                | 704   | 641   | 1.10 | 114   | 80    | 1.42 | 1.3 |
| A1BG               | NM_1307863                               | 2265  | 1723  | 1.30 | 557   | 495   | 1.13 | 1.2 |
| Eotaxin-3 / CCL26  | NM_006072                                | 626   | 449   | 1.39 | 39    | 38    | 1.03 | 1.2 |
| ErbB2              | NM_001005862                             | 526   | 399   | 1.32 | 80    | 72    | 1.10 | 1.2 |
| Alpha 1 AG         | NM_000607                                | 1310  | 922   | 1.40 | 472   | 464   | 1.02 | 1.2 |
| Dkk-1              | NM_012242                                | 1919  | 1669  | 1.15 | 174   | 137   | 1.27 | 1.2 |
| Insulin R          | NM_000208                                | 4002  | 3572  | 1.12 | 5434  | 4272  | 1.27 | 1.2 |
| IL-1 alpha         | NM_000575                                | 21393 | 18520 | 1.16 | 3673  | 2995  | 1.23 | 1.2 |
| FGF-20             | NM_019851                                | 1415  | 1072  | 1.32 | 161   | 154   | 1.05 | 1.2 |
| SOX2               | NM_003106                                | 190   | 148   | 1.30 | 26    | 26    | 1.02 | 1.2 |
| Calbindin          | NM_004929                                | 1351  | 1039  | 1.30 | 488   | 485   | 1.01 | 1.2 |
| Creatinine         | NM_001994                                | 1809  | 1375  | 1.30 | 647   | 646   | 1.00 | 1.2 |
| GLO-1              | NM_0067082                               | 759   | 602   | 1.26 | 75    | 73    | 1.03 | 1.1 |
| IL-1 F10 / IL-1HY2 | NM_173161                                | 1798  | 1478  | 1.22 | 262   | 245   | 1.07 | 1.1 |
| ApoC1              | NM_000384                                | 220   | 203   | 1.10 | 229   | 196   | 1.16 | 1.1 |
| IL-8               | NM_000584                                | 26309 | 21327 | 1.23 | 11585 | 11436 | 1.01 | 1.1 |
| EDG-1              | NM_001400                                | 6307  | 5809  | 1.09 | 1015  | 885   | 1.15 | 1.1 |
| Alpha 1            | NM_001633                                | 87    | 70    | 1.20 | 93    | 91    | 1.02 | 1.1 |

|                   |                         |       |       |      |       |       |      |     |
|-------------------|-------------------------|-------|-------|------|-------|-------|------|-----|
| Microglobulin     |                         |       |       |      |       |       |      |     |
| Glut1             | NM_006516               | 7683  | 7109  | 1.08 | 686   | 622   | 1.10 | 1.1 |
| IL-21             | NM_021803               | 21043 | 20359 | 1.03 | 11419 | 10452 | 1.09 | 1.1 |
| ABL1              | NM_007313               | 547   | 501   | 1.10 | 212   | 210   | 1.01 | 1.1 |
| Glut5             | NM_003039               | 8160  | 8383  | 0.97 | 1073  | 1113  | 0.96 | 1.0 |
| FGF-8             | NM_006119/<br>NM_033165 | 854   | 912   | 0.94 | 94    | 106   | 0.89 | 0.9 |
| Flt-3 Ligand      | NM_004119               | 1396  | 1460  | 0.96 | 205   | 242   | 0.85 | 0.9 |
| HVEM / TNFRSF14   | NM_003820               | 483   | 498   | 0.97 | 151   | 183   | 0.82 | 0.9 |
| Activin B         | NM_002193               | 166   | 209   | 0.79 | 103   | 104   | 0.99 | 0.9 |
| CD14              | NM_0005913              | 936   | 1203  | 0.78 | 115   | 118   | 0.98 | 0.9 |
| Hepassocin        | NM_004467               | 1456  | 1469  | 0.99 | 349   | 458   | 0.76 | 0.9 |
| FGF Basic         | NM_0020065              | 460   | 547   | 0.84 | 107   | 120   | 0.89 | 0.9 |
| FGF-6             | NM_020996               | 865   | 872   | 0.99 | 103   | 139   | 0.74 | 0.9 |
| Decorin           | NM_133507               | 995   | 1097  | 0.91 | 117   | 141   | 0.83 | 0.9 |
| MMP-20            | NM_004771               | 372   | 379   | 0.98 | 257   | 342   | 0.75 | 0.9 |
| Granzyme A        | NM_006144               | 40611 | 55760 | 0.73 | 21822 | 22021 | 0.99 | 0.9 |
| IFN-gamma         | NM_000619               | 37449 | 46979 | 0.80 | 15751 | 17140 | 0.92 | 0.9 |
| CXCR6             | NM_006564               | 674   | 738   | 0.91 | 152   | 191   | 0.80 | 0.9 |
| FGF-12            | NM_021032               | 1031  | 1072  | 0.96 | 153   | 206   | 0.74 | 0.9 |
| Frizzled-1        | NM_003505               | 1624  | 1975  | 0.82 | 283   | 322   | 0.88 | 0.9 |
| Glut3             | NM_006931               | 1148  | 1215  | 0.94 | 159   | 209   | 0.76 | 0.9 |
| IL-2 R gamma      | NM_000206               | 4724  | 4771  | 0.99 | 367   | 516   | 0.71 | 0.9 |
| GDF11             | NM_005811               | 8276  | 11391 | 0.73 | 9722  | 10011 | 0.97 | 0.8 |
| ASPH              | NM_004318               | 253   | 284   | 0.90 | 239   | 303   | 0.79 | 0.8 |
| CD27 / TNFRSF7    | NM_001242               | 662   | 772   | 0.86 | 79    | 96    | 0.83 | 0.8 |
| GM-CSF R alpha    | NM_172247               | 1094  | 1516  | 0.72 | 386   | 404   | 0.96 | 0.8 |
| ErbB4             | NM_005235               | 326   | 387   | 0.84 | 31    | 37    | 0.83 | 0.8 |
| FAM3B             | NM_058186               | 857   | 1069  | 0.80 | 181   | 210   | 0.86 | 0.8 |
| AMICA             | NM_153206               | 135   | 165   | 0.80 | 78    | 92    | 0.85 | 0.8 |
| CXCL16            | NM_022059               | 212   | 311   | 0.68 | 35    | 37    | 0.97 | 0.8 |
| ENA-78            | NM_002994               | 443   | 685   | 0.65 | 62    | 64    | 0.96 | 0.8 |
| CCR4              | NM_005508               | 541   | 631   | 0.86 | 168   | 226   | 0.74 | 0.8 |
| FGF-BP            | NM_005130               | 138   | 208   | 0.66 | 101   | 109   | 0.93 | 0.8 |
| BMP-4             | NM_130850               | 580   | 841   | 0.69 | 119   | 134   | 0.89 | 0.8 |
| Follistatin       | NM_013409               | 3079  | 3666  | 0.84 | 487   | 660   | 0.74 | 0.8 |
| CEA               | NM_006890               | 110   | 175   | 0.60 | 304   | 313   | 0.97 | 0.8 |
| 2B4               | NM_016382               | 128   | 187   | 0.70 | 71    | 83    | 0.86 | 0.8 |
| MTUS1             | XM_372031               | 111   | 120   | 0.90 | 107   | 162   | 0.66 | 0.8 |
| GDF3              | NM_020634               | 20485 | 29318 | 0.70 | 3786  | 4434  | 0.85 | 0.8 |
| CD200             | NM_001004196            | 180   | 210   | 0.90 | 97    | 151   | 0.64 | 0.8 |
| EDA-A2            | NM_001399               | 13932 | 16770 | 0.83 | 2400  | 3397  | 0.71 | 0.8 |
| GCSF              | NM_172220               | 21008 | 28670 | 0.73 | 1867  | 2329  | 0.80 | 0.8 |
| AR (Amphiregulin) | NM_001657               | 282   | 419   | 0.67 | 40    | 47    | 0.86 | 0.8 |
| BTC               | NM_001729               | 1969  | 3572  | 0.55 | 291   | 297   | 0.98 | 0.8 |
| Cryptic           | NM_032545               | 1752  | 2854  | 0.61 | 303   | 335   | 0.91 | 0.8 |
| BMP-3             | NM_001201               | 368   | 632   | 0.58 | 60    | 64    | 0.94 | 0.8 |
| Frizzled-3        | NM_017412               | 796   | 933   | 0.85 | 184   | 277   | 0.66 | 0.8 |

|                          |                         |       |       |      |      |      |      |     |
|--------------------------|-------------------------|-------|-------|------|------|------|------|-----|
| CCR9                     | NM_006641               | 287   | 308   | 0.93 | 80   | 140  | 0.57 | 0.8 |
| CD30 / TNFRSF8           | NM_001243               | 7699  | 10512 | 0.73 | 594  | 781  | 0.76 | 0.7 |
| Cerberus 1               | NM_005454               | 206   | 319   | 0.65 | 60   | 71   | 0.84 | 0.7 |
| Amylin                   | NM_000415               | 1501  | 1971  | 0.80 | 248  | 379  | 0.65 | 0.7 |
| CNDP1                    | NM_032649               | 79    | 96    | 0.80 | 181  | 277  | 0.65 | 0.7 |
| FGF-17                   | NM_003867               | 2240  | 2887  | 0.78 | 407  | 605  | 0.67 | 0.7 |
| CTLA-4 /CD152            | NM_005214               | 1171  | 2120  | 0.55 | 335  | 374  | 0.89 | 0.7 |
| EN-RAGE                  | NM_005621               | 134   | 282   | 0.47 | 45   | 46   | 0.97 | 0.7 |
| Ferritin                 | NM_000146               | 1823  | 2526  | 0.70 | 218  | 294  | 0.74 | 0.7 |
| Activin A                | NM_002192               | 7158  | 15597 | 0.46 | 1738 | 1783 | 0.97 | 0.7 |
| EMAP-II                  | NM_012155               | 1122  | 2031  | 0.55 | 203  | 230  | 0.88 | 0.7 |
| TRA-1-81                 | NM_001018111            | 1129  | 1688  | 0.70 | 280  | 391  | 0.72 | 0.7 |
| CCR1                     | NM_001295               | 191   | 232   | 0.82 | 39   | 66   | 0.59 | 0.7 |
| Artemin                  | NM_057160               | 365   | 809   | 0.45 | 172  | 179  | 0.96 | 0.7 |
| CRTH-2                   | NM_004778               | 794   | 1245  | 0.64 | 128  | 170  | 0.75 | 0.7 |
| GDNF                     | NM_000514               | 368   | 414   | 0.89 | 53   | 106  | 0.50 | 0.7 |
| Eotaxin / CCL11          | NM_002986               | 366   | 697   | 0.52 | 99   | 116  | 0.85 | 0.7 |
| GDF5                     | NM_000557               | 16039 | 23211 | 0.69 | 2335 | 3425 | 0.68 | 0.7 |
| Endostatin               | NM_030582               | 934   | 1452  | 0.64 | 127  | 175  | 0.73 | 0.7 |
| CV-2 / Crossveinless-2   | NM_005214               | 1285  | 1994  | 0.64 | 307  | 429  | 0.72 | 0.7 |
| Dkk-3                    | NM_013253               | 671   | 1106  | 0.61 | 72   | 96   | 0.75 | 0.7 |
| FGF-18                   | NM_033649/<br>NM_003862 | 2766  | 4492  | 0.62 | 379  | 514  | 0.74 | 0.7 |
| CCL14 / HCC-1 /<br>HCC-3 | NM_032962               | 905   | 1930  | 0.47 | 135  | 153  | 0.88 | 0.7 |
| ApoB100                  | NM_000483               | 77    | 112   | 0.70 | 58   | 89   | 0.65 | 0.7 |
| CCR2                     | NM_000647               | 186   | 219   | 0.85 | 30   | 61   | 0.49 | 0.7 |
| Frizzled-7               | NM_003507               | 199   | 287   | 0.69 | 93   | 144  | 0.65 | 0.7 |
| ApoB                     | NM_000384               | 341   | 624   | 0.50 | 163  | 195  | 0.84 | 0.7 |
| IL-1 F9 / IL-1 H1        | NM_019618               | 2212  | 2584  | 0.86 | 162  | 349  | 0.46 | 0.7 |
| DcR3 / TNFRSF6B          | NM_032945               | 296   | 482   | 0.61 | 77   | 111  | 0.70 | 0.7 |
| RET                      | NM_020975               | 221   | 265   | 0.80 | 69   | 141  | 0.49 | 0.6 |
| GDF9                     | NM_005260               | 4795  | 5378  | 0.89 | 1418 | 3632 | 0.39 | 0.6 |
| VDUP-1                   | NM_006472               | 5474  | 14895 | 0.40 | 8194 | 9355 | 0.88 | 0.6 |
| Angiopoietin-1           | NM_001146.<br>NM_139290 | 600   | 1163  | 0.52 | 255  | 337  | 0.76 | 0.6 |
| AMPKa1                   | NM_006251               | 116   | 370   | 0.30 | 83   | 86   | 0.96 | 0.6 |
| CD23                     | NM_002002               | 90    | 152   | 0.60 | 68   | 103  | 0.66 | 0.6 |
| DR3 / TNFRSF25           | NM_148965               | 208   | 596   | 0.35 | 168  | 189  | 0.89 | 0.6 |
| CLC                      | NM_001828               | 182   | 459   | 0.40 | 259  | 308  | 0.84 | 0.6 |
| BMP-6                    | NM_001718               | 184   | 487   | 0.38 | 114  | 137  | 0.83 | 0.6 |
| Activin RII A/B          | NM_001106               | 130   | 194   | 0.67 | 17   | 33   | 0.51 | 0.6 |
| FADD                     | NM_003824               | 449   | 599   | 0.75 | 23   | 54   | 0.42 | 0.6 |
| Fas Ligand               | NM_000639               | 425   | 499   | 0.85 | 43   | 139  | 0.31 | 0.6 |
| Axl                      | NM_021913               | 288   | 566   | 0.51 | 56   | 89   | 0.63 | 0.6 |
| CD24                     | NM_013230               | 66    | 198   | 0.30 | 134  | 160  | 0.84 | 0.6 |
| CCR6                     | NM_031409               | 74    | 107   | 0.69 | 27   | 63   | 0.42 | 0.6 |
| AgRP                     | NM_001138               | 827   | 2929  | 0.28 | 308  | 373  | 0.83 | 0.6 |
| BAF57                    | NM_003079               | 23    | 56    | 0.40 | 53   | 79   | 0.67 | 0.5 |



|                            |           |      |      |      |     |     |      |     |
|----------------------------|-----------|------|------|------|-----|-----|------|-----|
| <i>Activin RIB / ALK-4</i> | NM_020328 | 205  | 382  | 0.54 | 44  | 94  | 0.47 | 0.5 |
| <i>ALCAM</i>               | NM_001627 | 222  | 277  | 0.80 | 42  | 211 | 0.20 | 0.5 |
| <i>BMP-7</i>               | NM_001719 | 530  | 1602 | 0.33 | 279 | 431 | 0.65 | 0.5 |
| <i>BAFF R / TNFRSF13C</i>  | NM_052945 | 168  | 341  | 0.49 | 62  | 129 | 0.48 | 0.5 |
| <i>B7-1 / CD80</i>         | NM_005191 | 264  | 704  | 0.37 | 68  | 122 | 0.56 | 0.5 |
| <i>Angiopoietin-like 2</i> | NM_012098 | 1933 | 6205 | 0.31 | 238 | 405 | 0.59 | 0.4 |
| <i>ApoC2</i>               | NM_001645 | 21   | 113  | 0.20 | 62  | 100 | 0.62 | 0.4 |
| <i>Beta 2M</i>             | NM_004048 | 1    | 40   | 0.00 | 80  | 114 | 0.70 | 0.4 |
| <i>TAF4</i>                | NM_003185 | 1    | 78   | 0.00 | 31  | 48  | 0.64 | 0.3 |
| <i>Calbindin D</i>         | NM_004929 | 1    | 52   | 0.00 | 59  | 102 | 0.58 | 0.3 |
| <i>RIP1</i>                | NM_003804 | 1    | 42   | 0.00 | 50  | 103 | 0.49 | 0.2 |
| <i>pro-Glucagon</i>        | NM_002054 | 1    | 56   | 0.00 | 33  | 85  | 0.39 | 0.2 |
| <i>IL-36RN</i>             | NM_173170 | 1    | 56   | 0.00 | 28  | 80  | 0.35 | 0.2 |
| <i>FGFR3</i>               | NM_022965 | 1    | 81   | 0.01 | 24  | 105 | 0.23 | 0.1 |

Protein analysis of cEV/PDGF-EV samples performed in 2 independent experiments (in blue PDGF-EV, in rose cEVs, in yellow RQ of the first and second experiment). Only proteins consistently up-regulated or down-regulated in PDGF-EVs, or proteins expressed with RQ more than 0.5 and less than 2 in both experiments are presented. In bold – up-regulated in PDGF-EVs proteins, in italic – down-regulated in PDGF-EVs proteins.

Supplementary figure S2. Protein pattern of cEV and PDGF-EVs.

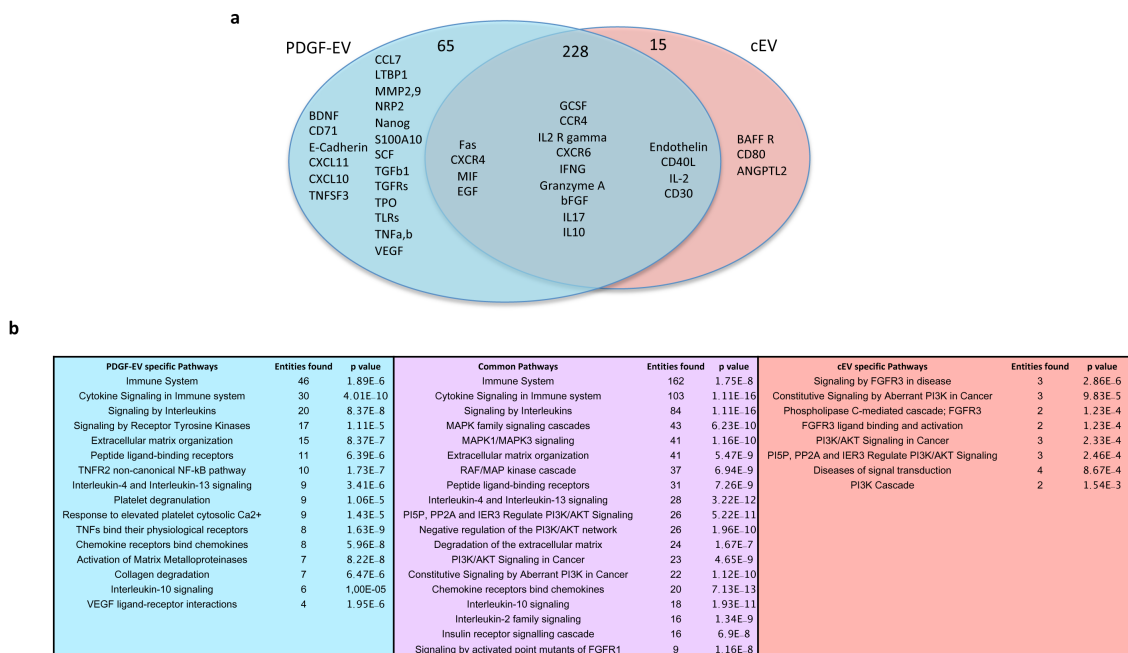

Supplementary figure S2. Protein pattern of cEV and PDGF-EVs. (a) proteins relevant for inflammation: PDGF-EVs - in blue, cEVs - in rose, in the middle – equally expressed proteins; (b) overrepresented signaling pathways found by bioinformatic analysis of up-regulated protein sets for both types of EVs.

Supplementary table 2. Expression of microRNA in cEVs and PDGF-EVs.

| PDGF-EV         |         | expressed in both cEVs and PDGF-EVs |                 |             |      |         | cEV            |         |
|-----------------|---------|-------------------------------------|-----------------|-------------|------|---------|----------------|---------|
| Target Name     | Cr Mean | Target Name                         | Cr Mean PDGF-EV | Cr Mean cEV | RQ   | P-Value | Target Name    | Cr Mean |
| hsa-miR-802     | 16.6    | hsa-miR-1226-5p                     | 29.8            | 29.4        | 0.5  | 0.005   | hsa-miR-1238   | 13.5    |
| hsa-miR-765     | 18.5    | hsa-miR-203a-3p                     | 30.4            | 31.5        | 2.0  | 0.017   | hsa-miR-1204   | 14.9    |
| hsa-miR-380-3p  | 18.8    | hsa-miR-99a-3p                      | 30.6            | 33.6        | 5.9  | 0.030   | hsa-miR-641    | 17.5    |
| hsa-miR-551b    | 20.4    | hsa-miR-125b                        | 23.0            | 23.8        | 2.4  | 0.031   | hsa-miR-659    | 19.0    |
| hsa-miR-872     | 23.8    | hsa-miR-195                         | 27.7            | 28.3        | 2.4  | 0.034   | hsa-miR-1253   | 23.5    |
| hsa-miR-211     | 26.4    | hsa-miR-1225-3p                     | 29.1            | 27.8        | 0.3  | 0.050   | hsa-miR-376b   | 24.8    |
| hsa-miR-567     | 27.9    | dme-miR-7                           | 33.4            | 34.9        | 1.2  | 1.000   | hsa-miR-556-3p | 25.9    |
| hsa-miR-208b    | 30.1    | hsa-let-7a                          | 25.9            | 26.1        | 1.2  | 0.985   | hsa-miR-1272   | 26.0    |
| hsa-miR-708-3p  | 30.2    | hsa-let-7b                          | 21.7            | 21.2        | 0.7  | 0.758   | hsa-miR-205    | 27.0    |
| hsa-miR-1296    | 30.7    | hsa-let-7b#                         | 25.8            | 29.4        | 13.9 | 1.000   | hsa-miR-330-5p | 28.8    |
| hsa-let-7e#     | 34.1    | hsa-let-7c                          | 27.2            | 27.7        | 1.5  | 0.386   | hsa-miR-183-3p | 30.0    |
| hsa-let-7f-2#   | 32.0    | hsa-let-7d                          | 26.4            | 26.7        | 1.2  | 0.753   | hsa-miR-500    | 30.6    |
| hsa-miR-122#    | 31.5    | hsa-let-7e                          | 22.7            | 19.4        | 0.1  | 0.359   | hsa-miR-1      | 32.9    |
| hsa-miR-1269    | 32.7    | hsa-let-7f                          | 28.0            | 29.7        | 3.4  | 0.632   | hsa-miR-1249   | 33.4    |
| hsa-miR-1276    | 33.9    | hsa-let-7g                          | 27.3            | 27.3        | 1.1  | 0.909   | hsa-miR-1256   | 34.9    |
| hsa-miR-129     | 33.4    | hsa-let-7i#                         | 32.0            | 32.1        | 0.8  | 0.511   | hsa-miR-130a#  | 33.4    |
| hsa-miR-133b    | 34.3    | hsa-miR-100                         | 21.9            | 22.4        | 1.5  | 0.719   | hsa-miR-132#   | 34.1    |
| hsa-miR-147b    | 33.5    | hsa-miR-100#                        | 33.9            | 32.8        | 0.5  | 1.000   | hsa-miR-138-2# | 34.1    |
| hsa-miR-154     | 32.0    | hsa-miR-101                         | 33.4            | 32.8        | 0.8  | 0.678   | hsa-miR-142-5p | 31.8    |
| hsa-miR-186#    | 32.8    | hsa-miR-103                         | 28.8            | 28.9        | 1.1  | 0.529   | hsa-miR-144    | 31.6    |
| hsa-miR-202     | 33.1    | hsa-miR-106a                        | 24.8            | 24.1        | 0.6  | 0.470   | hsa-miR-183    | 33.7    |
| hsa-miR-216b    | 34.3    | hsa-miR-106b                        | 27.5            | 27.9        | 1.4  | 0.727   | hsa-miR-192#   | 34.7    |
| hsa-miR-221#    | 33.0    | hsa-miR-106b#                       | 30.9            | 31.1        | 0.8  | 0.365   | hsa-miR-200a#  | 33.6    |
| hsa-miR-23b#    | 34.4    | hsa-miR-107                         | 33.1            | 31.8        | 0.4  | 0.677   | hsa-miR-24-1#  | 34.5    |
| hsa-miR-296-3p  | 34.2    | hsa-miR-10a                         | 27.0            | 27.1        | 1.1  | 0.815   | hsa-miR-32     | 33.6    |
| hsa-miR-338-5P  | 33.7    | hsa-miR-10a#                        | 29.6            | 31.6        | 3.1  | 0.265   | hsa-miR-383    | 31.4    |
| hsa-miR-34b     | 31.8    | hsa-miR-10b                         | 25.6            | 26.0        | 1.4  | 0.606   | hsa-miR-429    | 32.0    |
| hsa-miR-373     | 34.8    | hsa-miR-10b#                        | 26.2            | 27.2        | 1.4  | 0.948   | hsa-miR-453    | 35.0    |
| hsa-miR-381     | 33.5    | hsa-miR-1179                        | 33.4            | 32.3        | 0.4  | 0.931   | hsa-miR-483-3p | 31.0    |
| hsa-miR-432#    | 32.8    | hsa-miR-1180                        | 30.7            | 30.7        | 0.9  | 0.656   | hsa-miR-487a   | 33.0    |
| hsa-miR-502     | 31.3    | hsa-miR-1183                        | 34.4            | 32.5        | 0.1  | 1.000   | hsa-miR-488    | 33.6    |
| hsa-miR-511     | 33.3    | hsa-miR-1208                        | 33.3            | 32.1        | 0.3  | 0.498   | hsa-miR-508    | 34.9    |
| hsa-miR-518a-5p | 34.6    | hsa-miR-122                         | 32.0            | 30.6        | 0.3  | 1.000   | hsa-miR-512-5p | 31.7    |
| hsa-miR-525-3p  | 32.4    | hsa-miR-1227                        | 32.3            | 31.9        | 0.6  | 0.483   | hsa-miR-515-5p | 33.9    |
| hsa-miR-548c-5p | 33.7    | hsa-miR-1228#                       | 23.9            | 30.1        | 71.4 | 1.000   | hsa-miR-516-3p | 32.7    |
| hsa-miR-548I    | 31.5    | hsa-miR-1233                        | 26.0            | 26.8        | 1.6  | 0.801   | hsa-miR-517c   | 32.8    |
| hsa-miR-550     | 33.4    | hsa-miR-1244                        | 32.3            | 32.3        | 0.8  | 0.878   | hsa-miR-519e#  | 32.8    |
| hsa-miR-562     | 34.8    | hsa-miR-1247                        | 25.3            | 24.7        | 0.5  | 0.900   | hsa-miR-521    | 31.7    |
| hsa-miR-575     | 33.8    | hsa-miR-1254                        | 29.4            | 29.5        | 0.8  | 0.474   | hsa-miR-541    | 31.3    |
| hsa-miR-579     | 34.5    | hsa-miR-1255B                       | 32.6            | 33.0        | 0.9  | 0.688   | hsa-miR-545    | 33.2    |
| hsa-miR-581     | 34.4    | hsa-miR-125a-3p                     | 31.4            | 30.2        | 0.7  | 0.576   | hsa-miR-592    | 32.9    |
| hsa-miR-582-5p  | 34.8    | hsa-miR-125a-5p                     | 25.1            | 25.4        | 1.3  | 0.641   | hsa-miR-595    | 32.1    |
| hsa-miR-604     | 34.4    | hsa-miR-125b-1#                     | 28.8            | 30.0        | 1.6  | 0.530   | hsa-miR-875-5p | 33.7    |
| hsa-miR-614     | 33.0    | hsa-miR-125b-2#                     | 27.6            | 29.0        | 1.9  | 0.328   | hsa-miR-876-5p | 34.5    |
| hsa-miR-621     | 34.5    | hsa-miR-126                         | 27.2            | 24.5        | 0.2  | 0.327   | hsa-miR-892b   | 31.4    |
| hsa-miR-643     | 32.4    | hsa-miR-126#                        | 32.4            | 28.7        | 0.1  | 0.404   | hsa-miR-9#     | 32.9    |
| hsa-miR-92a-1#  | 34.6    | hsa-miR-1260                        | 25.1            | 27.5        | 3.6  | 0.398   | hsa-miR-937    | 34.4    |
| hsa-miR-943     | 33.7    | hsa-miR-1262                        | 15.7            | 18.2        | 2.8  | 0.972   | hsa-miR-938    | 34.4    |
| hsa-miR-944     | 33.6    | hsa-miR-1267                        | 34.0            | 31.1        | 0.1  | 0.439   |                |         |
|                 |         | hsa-miR-127                         | 26.3            | 27.0        | 1.7  | 0.259   |                |         |
|                 |         | hsa-miR-1270                        | 31.0            | 31.9        | 1.3  | 0.528   |                |         |
|                 |         | hsa-miR-1271                        | 26.5            | 27.8        | 1.7  | 0.451   |                |         |
|                 |         | hsa-miR-1274A                       | 17.4            | 18.2        | 1.3  | 0.771   |                |         |
|                 |         | hsa-miR-1274B                       | 16.5            | 17.2        | 1.1  | 0.673   |                |         |

|                 |      |      |       |       |
|-----------------|------|------|-------|-------|
| hsa-miR-1275    | 27.7 | 28.6 | 1.3   | 0.911 |
| hsa-miR-1285    | 27.5 | 30.3 | 4.9   | 0.227 |
| hsa-miR-128a    | 30.6 | 31.0 | 1.1   | 0.619 |
| hsa-miR-1290    | 25.5 | 24.2 | 0.3   | 0.348 |
| hsa-miR-1291    | 29.1 | 29.7 | 1.1   | 0.807 |
| hsa-miR-1298    | 25.7 | 20.6 | 0.0   | 0.500 |
| hsa-miR-1300    | 27.8 | 25.9 | 0.2   | 0.420 |
| hsa-miR-1303    | 29.7 | 31.3 | 2.8   | 0.366 |
| hsa-miR-1305    | 22.7 | 30.2 | 109.5 | 0.479 |
| hsa-miR-130a    | 28.8 | 28.7 | 1.0   | 0.349 |
| hsa-miR-130b    | 28.2 | 28.4 | 1.9   | 0.206 |
| hsa-miR-130b#   | 29.2 | 28.6 | 0.6   | 0.471 |
| hsa-miR-132     | 25.6 | 26.1 | 1.4   | 0.420 |
| hsa-miR-133a    | 29.2 | 28.6 | 0.7   | 0.437 |
| hsa-miR-135b    | 31.8 | 29.5 | 0.3   | 0.776 |
| hsa-miR-135b#   | 31.2 | 30.7 | 1.0   | 1.000 |
| hsa-miR-136     | 30.7 | 28.4 | 0.3   | 0.649 |
| hsa-miR-136#    | 29.4 | 30.1 | 1.1   | 0.700 |
| hsa-miR-138     | 26.0 | 27.0 | 2.0   | 0.271 |
| hsa-miR-139-3p  | 33.1 | 29.7 | 0.1   | 0.185 |
| hsa-miR-139-5p  | 30.7 | 28.6 | 0.2   | 0.329 |
| hsa-miR-140-3p  | 30.8 | 29.9 | 0.5   | 0.500 |
| hsa-miR-141     | 33.8 | 33.0 | 1.0   | 1.000 |
| hsa-miR-142-3p  | 32.6 | 29.1 | 0.1   | 0.320 |
| hsa-miR-143     | 27.5 | 27.6 | 1.1   | 0.729 |
| hsa-miR-144#    | 34.7 | 30.4 | 0.0   | 1.000 |
| hsa-miR-145     | 22.6 | 23.2 | 1.6   | 0.374 |
| hsa-miR-145#    | 31.0 | 32.5 | 2.1   | 0.393 |
| hsa-miR-146a    | 23.3 | 23.1 | 0.9   | 0.839 |
| hsa-miR-146b    | 24.5 | 24.0 | 0.8   | 0.637 |
| hsa-miR-146b-3p | 33.5 | 30.6 | 0.3   | 1.000 |
| hsa-miR-148a    | 29.1 | 30.3 | 2.4   | 0.295 |
| hsa-miR-148a#   | 32.9 | 32.8 | 0.8   | 0.718 |
| hsa-miR-148b    | 30.3 | 28.6 | 0.6   | 0.557 |
| hsa-miR-148b#   | 32.6 | 32.4 | 0.6   | 0.561 |
| hsa-miR-149     | 25.2 | 25.8 | 1.6   | 0.497 |
| hsa-miR-150     | 28.0 | 25.1 | 0.1   | 0.280 |
| hsa-miR-151-3p  | 23.8 | 24.5 | 1.2   | 0.757 |
| hsa-miR-151-5P  | 25.6 | 26.6 | 1.3   | 0.577 |
| hsa-miR-152     | 26.3 | 26.5 | 1.2   | 0.479 |
| hsa-miR-154#    | 34.5 | 33.4 | 0.4   | 1.000 |
| hsa-miR-155     | 24.9 | 24.5 | 0.8   | 0.570 |
| hsa-miR-15a     | 29.1 | 27.6 | 0.3   | 0.238 |
| hsa-miR-15a#    | 29.5 | 33.4 | 11.4  | 0.283 |
| hsa-miR-15b     | 28.0 | 28.0 | 1.0   | 0.766 |
| hsa-miR-15b#    | 28.1 | 27.6 | 0.5   | 0.911 |
| hsa-miR-16      | 23.9 | 23.4 | 0.7   | 0.525 |
| hsa-miR-16-1#   | 30.9 | 31.8 | 1.3   | 0.533 |
| hsa-miR-16-2#   | 29.5 | 29.3 | 0.3   | 1.000 |
| hsa-miR-17      | 25.4 | 24.9 | 0.7   | 0.558 |
| hsa-miR-17#     | 33.0 | 33.8 | 0.8   | 1.000 |
| hsa-miR-181a    | 27.2 | 27.4 | 1.2   | 0.860 |
| hsa-miR-181a-2# | 29.9 | 29.9 | 0.7   | 0.857 |
| hsa-miR-181c    | 33.5 | 32.2 | 0.5   | 0.552 |
| hsa-miR-181c#   | 31.9 | 30.5 | 0.3   | 0.958 |
| hsa-miR-182     | 33.6 | 30.1 | 0.2   | 1.000 |
| hsa-miR-1825    | 31.2 | 34.4 | 7.2   | 0.504 |
| hsa-miR-184     | 31.3 | 30.4 | 0.5   | 0.602 |

|                  |      |      |       |       |
|------------------|------|------|-------|-------|
| hsa-miR-185      | 29.9 | 31.3 | 2.0   | 0.358 |
| hsa-miR-186      | 24.5 | 24.5 | 1.0   | 0.749 |
| hsa-miR-18a      | 30.5 | 31.1 | 1.1   | 0.726 |
| hsa-miR-18a#     | 31.7 | 31.5 | 0.6   | 0.597 |
| hsa-miR-18b      | 32.6 | 29.0 | 0.1   | 0.427 |
| hsa-miR-190      | 34.2 | 33.5 | 0.4   | 0.533 |
| hsa-miR-190b     | 20.9 | 28.7 | 155.5 | 0.397 |
| hsa-miR-191      | 22.4 | 21.2 | 0.4   | 0.337 |
| hsa-miR-191#     | 31.3 | 30.2 | 0.4   | 0.411 |
| hsa-miR-192      | 31.7 | 30.4 | 0.4   | 0.608 |
| hsa-miR-193a-3p  | 29.1 | 31.4 | 3.6   | 0.102 |
| hsa-miR-193a-5p  | 26.4 | 27.2 | 1.7   | 0.510 |
| hsa-miR-193b     | 21.1 | 21.0 | 1.0   | 0.859 |
| hsa-miR-193b#    | 28.5 | 29.0 | 1.0   | 0.753 |
| hsa-miR-194      | 31.9 | 31.1 | 0.6   | 0.516 |
| hsa-miR-196b     | 28.5 | 28.4 | 1.0   | 0.989 |
| hsa-miR-197      | 23.4 | 23.4 | 1.0   | 0.959 |
| hsa-miR-198      | 32.6 | 33.5 | 2.0   | 0.655 |
| hsa-miR-199a     | 30.5 | 32.4 | 4.0   | 0.254 |
| hsa-miR-199a-3p  | 24.5 | 25.0 | 1.4   | 0.576 |
| hsa-miR-199b     | 29.6 | 29.0 | 0.7   | 0.420 |
| hsa-miR-19a      | 29.8 | 30.0 | 1.1   | 0.825 |
| hsa-miR-19b      | 24.0 | 24.1 | 1.1   | 0.693 |
| hsa-miR-19b-1#   | 31.4 | 31.8 | 0.9   | 0.669 |
| hsa-miR-200a     | 31.8 | 27.4 | 0.1   | 0.440 |
| hsa-miR-200b     | 30.3 | 28.6 | 0.6   | 1.000 |
| hsa-miR-200c     | 30.4 | 28.7 | 0.3   | 0.213 |
| hsa-miR-204      | 27.6 | 28.0 | 1.4   | 0.809 |
| hsa-miR-206      | 33.2 | 33.3 | 0.9   | 0.830 |
| hsa-miR-20a      | 25.4 | 25.3 | 1.0   | 0.874 |
| hsa-miR-20a#     | 32.8 | 33.6 | 1.8   | 1.000 |
| hsa-miR-20b      | 30.4 | 29.7 | 0.7   | 0.396 |
| hsa-miR-21       | 23.0 | 23.4 | 1.4   | 0.332 |
| hsa-miR-21#      | 29.4 | 30.2 | 1.2   | 0.802 |
| hsa-miR-210      | 23.4 | 24.5 | 1.5   | 0.730 |
| hsa-miR-212      | 26.7 | 27.6 | 2.0   | 0.756 |
| hsa-miR-213      | 32.0 | 32.7 | 1.1   | 0.992 |
| hsa-miR-214      | 25.8 | 23.4 | 0.2   | 0.985 |
| hsa-miR-214#     | 27.5 | 29.4 | 2.7   | 0.312 |
| hsa-miR-215      | 29.1 | 31.5 | 3.7   | 0.184 |
| hsa-miR-216a     | 30.3 | 31.7 | 2.2   | 1.000 |
| hsa-miR-218      | 23.7 | 25.4 | 2.3   | 0.212 |
| hsa-miR-218-2#   | 32.8 | 33.7 | 2.6   | 1.000 |
| hsa-miR-219      | 26.7 | 27.9 | 2.0   | 1.000 |
| hsa-miR-219-2-3p | 20.6 | 23.3 | 2.7   | 1.000 |
| hsa-miR-22       | 24.1 | 24.7 | 1.7   | 0.887 |
| hsa-miR-22#      | 27.0 | 29.5 | 4.1   | 0.208 |
| hsa-miR-221      | 24.7 | 25.8 | 2.1   | 0.379 |
| hsa-miR-222      | 19.0 | 20.0 | 2.1   | 0.232 |
| hsa-miR-222#     | 24.7 | 26.9 | 3.1   | 0.573 |
| hsa-miR-223      | 27.9 | 25.3 | 0.2   | 0.353 |
| hsa-miR-223#     | 33.4 | 30.5 | 0.1   | 0.161 |
| hsa-miR-224      | 27.5 | 27.8 | 1.3   | 0.399 |
| hsa-miR-23a      | 28.4 | 30.3 | 3.8   | 0.164 |
| hsa-miR-24       | 19.5 | 19.6 | 1.1   | 0.763 |
| hsa-miR-24-2#    | 29.5 | 31.4 | 3.3   | 0.299 |
| hsa-miR-25       | 29.2 | 29.3 | 1.1   | 0.752 |
| hsa-miR-25#      | 30.4 | 31.8 | 1.6   | 0.559 |

|                |      |      |      |       |
|----------------|------|------|------|-------|
| hsa-miR-26a    | 25.9 | 26.0 | 1.1  | 0.852 |
| hsa-miR-26a-1# | 30.8 | 31.1 | 0.8  | 0.751 |
| hsa-miR-26b    | 28.8 | 29.6 | 1.8  | 0.835 |
| hsa-miR-26b#   | 31.4 | 32.5 | 1.5  | 0.908 |
| hsa-miR-27a    | 28.0 | 28.2 | 1.2  | 0.438 |
| hsa-miR-27a#   | 27.7 | 28.8 | 1.5  | 0.962 |
| hsa-miR-27b    | 28.0 | 28.8 | 1.9  | 0.406 |
| hsa-miR-27b#   | 29.4 | 27.6 | 0.3  | 0.461 |
| hsa-miR-28     | 28.5 | 28.7 | 1.2  | 0.498 |
| hsa-miR-28-3p  | 25.4 | 25.8 | 1.4  | 0.323 |
| hsa-miR-296    | 28.2 | 30.4 | 4.0  | 0.249 |
| hsa-miR-299-3p | 30.8 | 28.8 | 0.2  | 1.000 |
| hsa-miR-299-5p | 25.0 | 21.9 | 0.1  | 0.502 |
| hsa-miR-29a    | 23.0 | 23.5 | 1.4  | 0.462 |
| hsa-miR-29a#   | 29.6 | 31.5 | 2.7  | 0.476 |
| hsa-miR-29b    | 30.9 | 30.4 | 1.3  | 0.464 |
| hsa-miR-29b-1# | 31.7 | 33.2 | 1.1  | 1.000 |
| hsa-miR-29b-2# | 33.4 | 34.0 | 1.1  | 1.000 |
| hsa-miR-29c    | 33.3 | 34.5 | 2.3  | 0.312 |
| hsa-miR-301    | 29.1 | 29.1 | 1.0  | 0.746 |
| hsa-miR-301b   | 35.0 | 34.0 | 0.6  | 1.000 |
| hsa-miR-302a   | 26.5 | 26.5 | 2.6  | 1.000 |
| hsa-miR-302d   | 33.5 | 32.1 | 0.5  | 1.000 |
| hsa-miR-30a-3p | 23.3 | 23.2 | 0.7  | 0.500 |
| hsa-miR-30a-5p | 25.2 | 25.8 | 1.0  | 0.990 |
| hsa-miR-30b    | 25.8 | 26.0 | 1.2  | 0.566 |
| hsa-miR-30c    | 25.4 | 25.7 | 1.3  | 0.568 |
| hsa-miR-30d    | 27.6 | 26.4 | 0.3  | 0.427 |
| hsa-miR-30d#   | 29.0 | 29.0 | 0.7  | 0.900 |
| hsa-miR-30e-3p | 23.3 | 23.3 | 0.7  | 0.448 |
| hsa-miR-31     | 22.0 | 22.4 | 1.4  | 0.885 |
| hsa-miR-31#    | 22.5 | 24.0 | 2.0  | 0.931 |
| hsa-miR-320    | 23.0 | 22.7 | 0.8  | 0.596 |
| hsa-miR-320B   | 29.1 | 29.6 | 1.0  | 0.965 |
| hsa-miR-323-3p | 28.9 | 28.4 | 0.7  | 0.907 |
| hsa-miR-324-3p | 28.1 | 27.6 | 0.7  | 0.842 |
| hsa-miR-324-5p | 29.9 | 30.4 | 1.6  | 0.493 |
| hsa-miR-326    | 33.0 | 32.5 | 1.3  | 0.440 |
| hsa-miR-328    | 28.1 | 28.7 | 1.6  | 0.575 |
| hsa-miR-329    | 26.6 | 18.6 | 0.0  | 1.000 |
| hsa-miR-330    | 29.6 | 30.0 | 1.0  | 0.773 |
| hsa-miR-331    | 24.5 | 24.7 | 1.2  | 0.838 |
| hsa-miR-331-5p | 27.7 | 28.7 | 3.5  | 0.342 |
| hsa-miR-335    | 28.0 | 29.6 | 3.1  | 0.132 |
| hsa-miR-335#   | 27.7 | 28.7 | 1.4  | 0.701 |
| hsa-miR-337-3p | 29.6 | 34.9 | 30.6 | 0.245 |
| hsa-miR-337-5p | 30.4 | 28.9 | 0.6  | 0.429 |
| hsa-miR-338-3p | 33.5 | 32.5 | 0.6  | 0.564 |
| hsa-miR-339-3p | 28.4 | 27.8 | 0.7  | 0.472 |
| hsa-miR-339-5p | 28.7 | 30.0 | 2.5  | 0.212 |
| hsa-miR-33a    | 34.4 | 33.7 | 0.5  | 0.612 |
| hsa-miR-33a#   | 31.0 | 32.8 | 2.4  | 0.363 |
| hsa-miR-33b    | 32.0 | 29.9 | 0.5  | 0.679 |
| hsa-miR-340    | 32.1 | 32.5 | 1.1  | 0.987 |
| hsa-miR-340#   | 32.2 | 31.2 | 0.4  | 0.545 |
| hsa-miR-342-3p | 22.0 | 21.5 | 0.8  | 0.948 |
| hsa-miR-342-5p | 30.3 | 26.4 | 0.3  | 1.000 |
| hsa-miR-345    | 28.1 | 28.3 | 1.2  | 0.553 |

|                 |      |      |      |       |
|-----------------|------|------|------|-------|
| hsa-miR-34a     | 27.4 | 28.0 | 1.6  | 0.220 |
| hsa-miR-34a#    | 24.9 | 25.8 | 1.3  | 0.483 |
| hsa-miR-34b     | 26.2 | 27.5 | 1.7  | 0.280 |
| hsa-miR-34c     | 31.5 | 31.1 | 0.9  | 0.633 |
| hsa-miR-361     | 30.0 | 30.1 | 2.0  | 0.245 |
| hsa-miR-361-3p  | 31.3 | 30.1 | 0.5  | 1.000 |
| hsa-miR-362     | 28.5 | 29.2 | 1.2  | 0.867 |
| hsa-miR-362-3p  | 32.1 | 32.5 | 1.4  | 0.359 |
| hsa-miR-365     | 26.7 | 30.0 | 11.8 | 0.451 |
| hsa-miR-369-3p  | 33.8 | 33.4 | 2.0  | 1.000 |
| hsa-miR-369-5p  | 34.4 | 33.7 | 2.5  | 1.000 |
| hsa-miR-370     | 26.9 | 27.0 | 1.1  | 0.455 |
| hsa-miR-374     | 28.4 | 27.2 | 0.5  | 0.722 |
| hsa-miR-375     | 33.1 | 32.5 | 1.0  | 0.874 |
| hsa-miR-376a    | 26.7 | 26.6 | 1.0  | 0.804 |
| hsa-miR-376a#   | 32.8 | 30.6 | 0.2  | 0.501 |
| hsa-miR-376c    | 26.2 | 26.1 | 0.9  | 0.776 |
| hsa-miR-377#    | 34.0 | 33.8 | 0.4  | 1.000 |
| hsa-miR-378     | 29.0 | 29.0 | 0.7  | 0.708 |
| hsa-miR-378     | 33.0 | 33.9 | 2.0  | 1.000 |
| hsa-miR-380-5p  | 31.1 | 33.2 | 3.0  | 0.347 |
| hsa-miR-382     | 24.8 | 24.7 | 1.0  | 0.619 |
| hsa-miR-384     | 25.6 | 25.7 | 2.8  | 1.000 |
| hsa-miR-409-3p  | 20.9 | 21.4 | 1.0  | 0.932 |
| hsa-miR-409-5p  | 32.6 | 34.7 | 7.7  | 0.052 |
| hsa-miR-410     | 29.9 | 30.1 | 1.2  | 0.860 |
| hsa-miR-411     | 28.5 | 29.1 | 1.5  | 0.785 |
| hsa-miR-411#    | 32.4 | 32.6 | 0.8  | 0.869 |
| hsa-miR-412     | 32.3 | 34.1 | 2.2  | 0.811 |
| hsa-miR-422a    | 32.8 | 28.2 | 0.1  | 1.000 |
| hsa-miR-423-5p  | 30.7 | 30.6 | 1.0  | 0.323 |
| hsa-miR-424     | 30.8 | 32.4 | 3.4  | 0.192 |
| hsa-miR-424#    | 28.1 | 29.5 | 1.9  | 0.096 |
| hsa-miR-425-5p  | 26.7 | 27.1 | 1.3  | 0.949 |
| hsa-miR-425#    | 30.3 | 28.6 | 0.2  | 0.200 |
| hsa-miR-431     | 28.0 | 28.0 | 1.1  | 0.687 |
| hsa-miR-432     | 25.7 | 24.9 | 0.4  | 0.246 |
| hsa-miR-433     | 31.8 | 29.7 | 0.2  | 0.286 |
| hsa-miR-449     | 32.2 | 33.3 | 3.9  | 0.456 |
| hsa-miR-449b    | 35.0 | 33.4 | 0.4  | 1.000 |
| hsa-miR-450a    | 32.3 | 31.5 | 0.7  | 1.000 |
| hsa-miR-450b-3p | 32.0 | 30.8 | 1.1  | 1.000 |
| hsa-miR-450b-5p | 34.6 | 34.5 | 1.6  | 0.328 |
| hsa-miR-452     | 28.0 | 28.9 | 1.4  | 0.783 |
| hsa-miR-454     | 27.4 | 26.7 | 0.6  | 0.323 |
| hsa-miR-454#    | 32.1 | 33.5 | 1.9  | 0.866 |
| hsa-miR-455     | 30.8 | 30.7 | 0.9  | 0.844 |
| hsa-miR-455-3p  | 30.5 | 29.0 | 0.7  | 0.833 |
| hsa-miR-483-5p  | 31.0 | 32.9 | 2.8  | 0.355 |
| hsa-miR-484     | 22.3 | 21.9 | 0.8  | 0.893 |
| hsa-miR-485-3p  | 30.3 | 30.0 | 1.0  | 0.879 |
| hsa-miR-485-5p  | 29.2 | 30.6 | 2.0  | 0.833 |
| hsa-miR-486     | 32.8 | 29.7 | 0.1  | 0.209 |
| hsa-miR-487b    | 29.1 | 30.1 | 1.5  | 0.717 |
| hsa-miR-489     | 32.9 | 31.7 | 0.3  | 0.412 |
| hsa-miR-492     | 31.8 | 31.8 | 2.2  | 0.587 |
| hsa-miR-493     | 29.0 | 30.4 | 2.0  | 0.372 |
| hsa-miR-494     | 28.8 | 28.3 | 0.7  | 0.779 |

|                 |      |      |          |       |
|-----------------|------|------|----------|-------|
| hsa-miR-497     | 31.0 | 32.9 | 3.4      | 0.606 |
| hsa-miR-500     | 31.3 | 33.2 | 2.8      | 0.313 |
| hsa-miR-501     | 28.4 | 29.9 | 2.1      | 0.487 |
| hsa-miR-501-3p  | 31.7 | 30.7 | 0.5      | 0.621 |
| hsa-miR-502-3p  | 31.9 | 34.5 | 3.7      | 0.364 |
| hsa-miR-503     | 30.6 | 30.0 | 0.5      | 0.398 |
| hsa-miR-505     | 30.2 | 32.4 | 8.2      | 1.000 |
| hsa-miR-505#    | 31.4 | 31.5 | 0.8      | 0.516 |
| hsa-miR-512-3p  | 34.0 | 33.9 | 1.3      | 0.518 |
| hsa-miR-513-5p  | 26.2 | 31.0 | 51.3     | 1.000 |
| hsa-miR-517a    | 25.0 | 24.5 | 0.6      | 0.423 |
| hsa-miR-518a-3p | 24.6 | 27.8 | 16.7     | 0.509 |
| hsa-miR-518b    | 26.1 | 24.7 | 2.0      | 1.000 |
| hsa-miR-518d    | 28.5 | 29.6 | 2.4      | 0.609 |
| hsa-miR-518f    | 25.1 | 29.5 | 30.1     | 0.576 |
| hsa-miR-519a    | 24.8 | 23.8 | 1.8      | 0.595 |
| hsa-miR-519b-3p | 21.6 | 32.0 | 675.1    | 0.498 |
| hsa-miR-520a    | 33.5 | 21.3 | 0.0      | 1.000 |
| hsa-miR-520a#   | 15.3 | 19.2 | 26.0     | 1.000 |
| hsa-miR-520b    | 28.8 | 31.6 | 8.7      | 1.000 |
| hsa-miR-520c-3p | 32.9 | 34.9 | 4.6      | 0.335 |
| hsa-miR-520D-3P | 27.4 | 27.4 | 0.7      | 0.881 |
| hsa-miR-520d-5p | 29.1 | 31.2 | 4.7      | 0.605 |
| hsa-miR-520f    | 28.2 | 28.6 | 3.7      | 1.000 |
| hsa-miR-520g    | 25.8 | 20.8 | 0.0      | 1.000 |
| hsa-miR-523     | 24.5 | 23.5 | 1.4      | 1.000 |
| hsa-miR-532     | 26.1 | 26.6 | 1.6      | 0.323 |
| hsa-miR-532-3p  | 26.7 | 27.1 | 1.5      | 0.477 |
| hsa-miR-539     | 27.4 | 27.3 | 1.0      | 0.991 |
| hsa-miR-541#    | 32.9 | 28.1 | 0.0      | 1.000 |
| hsa-miR-542-3p  | 32.1 | 33.9 | 3.1      | 0.509 |
| hsa-miR-542-5p  | 30.4 | 31.4 | 1.4      | 0.816 |
| hsa-miR-543     | 29.7 | 30.5 | 1.2      | 0.735 |
| hsa-miR-545#    | 30.2 | 33.4 | 4.4      | 0.507 |
| hsa-miR-548a    | 30.8 | 32.6 | 4.0      | 0.266 |
| hsa-miR-548b    | 30.5 | 26.3 | 0.1      | 1.000 |
| hsa-miR-548c    | 30.8 | 30.6 | 1.3      | 0.500 |
| hsa-miR-548d-5p | 30.9 | 32.3 | 1.1      | 1.000 |
| hsa-miR-549     | 32.5 | 33.7 | 2.1      | 0.251 |
| hsa-miR-550     | 31.0 | 32.9 | 2.5      | 0.282 |
| hsa-miR-551a    | 13.3 | 22.6 | 280.2    | 1.000 |
| hsa-miR-561     | 18.3 | 28.3 | 1.901485 | 1.000 |
| hsa-miR-564     | 32.2 | 33.7 | 1.8      | 0.682 |
| hsa-miR-566     | 28.9 | 34.8 | 61.2     | 1.000 |
| hsa-miR-570     | 33.3 | 31.9 | 1.0      | 1.000 |
| hsa-miR-571     | 31.2 | 31.9 | 1.2      | 0.581 |
| hsa-miR-572     | 30.3 | 31.0 | 1.0      | 0.980 |
| hsa-miR-574-3p  | 22.8 | 22.0 | 0.6      | 0.418 |
| hsa-miR-576-3p  | 33.4 | 33.5 | 1.2      | 0.596 |
| hsa-miR-582-3p  | 29.3 | 32.5 | 11.2     | 1.000 |
| hsa-miR-584     | 30.5 | 29.0 | 0.3      | 0.108 |
| hsa-miR-589     | 30.1 | 29.6 | 0.5      | 0.294 |
| hsa-miR-589     | 34.4 | 34.5 | 3.0      | 1.000 |
| hsa-miR-590-3P  | 29.5 | 30.5 | 1.5      | 0.974 |
| hsa-miR-590-5p  | 28.6 | 29.3 | 1.7      | 0.185 |
| hsa-miR-593     | 32.3 | 34.0 | 3.0      | 0.456 |
| hsa-miR-596     | 27.2 | 30.0 | 5.2      | 0.756 |
| hsa-miR-597     | 31.9 | 32.2 | 1.4      | 1.000 |

|                |      |      |      |       |
|----------------|------|------|------|-------|
| hsa-miR-598    | 29.2 | 28.2 | 0.6  | 0.559 |
| hsa-miR-603    | 30.2 | 30.2 | 0.7  | 0.618 |
| hsa-miR-605    | 34.0 | 31.0 | 0.1  | 0.968 |
| hsa-miR-615-5p | 32.4 | 33.8 | 3.4  | 1.000 |
| hsa-miR-616    | 33.1 | 31.9 | 0.4  | 0.098 |
| hsa-miR-616    | 30.8 | 31.1 | 0.9  | 0.664 |
| hsa-miR-618    | 33.9 | 33.6 | 2.2  | 1.000 |
| hsa-miR-622    | 32.4 | 30.4 | 0.3  | 1.000 |
| hsa-miR-623    | 30.8 | 26.7 | 0.0  | 1.000 |
| hsa-miR-625    | 34.1 | 32.2 | 0.3  | 0.993 |
| hsa-miR-625#   | 25.8 | 26.1 | 0.9  | 0.984 |
| hsa-miR-627    | 29.8 | 33.9 | 19.3 | 0.513 |
| hsa-miR-628-3p | 29.1 | 28.3 | 0.4  | 0.116 |
| hsa-miR-628-5p | 30.3 | 30.7 | 0.9  | 0.498 |
| hsa-miR-629    | 29.3 | 28.2 | 0.3  | 0.364 |
| hsa-miR-629    | 31.7 | 33.6 | 10.3 | 1.000 |
| hsa-miR-636    | 32.6 | 31.3 | 1.0  | 0.807 |
| hsa-miR-638    | 28.2 | 28.7 | 1.3  | 0.409 |
| hsa-miR-639    | 26.3 | 26.9 | 1.1  | 0.473 |
| hsa-miR-642    | 32.7 | 28.2 | 0.1  | 0.503 |
| hsa-miR-649    | 32.6 | 21.2 | 0.0  | 1.000 |
| hsa-miR-650    | 30.6 | 30.8 | 0.8  | 0.618 |
| hsa-miR-652    | 34.0 | 31.1 | 0.1  | 0.076 |
| hsa-miR-654    | 29.7 | 30.8 | 2.4  | 0.546 |
| hsa-miR-654-3p | 34.2 | 34.5 | 1.0  | 1.000 |
| hsa-miR-655    | 29.8 | 30.6 | 1.9  | 0.290 |
| hsa-miR-656    | 30.4 | 31.4 | 1.6  | 0.577 |
| hsa-miR-657    | 32.6 | 34.1 | 3.9  | 1.000 |
| hsa-miR-660    | 26.9 | 26.8 | 1.0  | 0.836 |
| hsa-miR-661    | 32.2 | 31.4 | 0.5  | 0.571 |
| hsa-miR-663B   | 26.5 | 28.3 | 2.5  | 0.607 |
| hsa-miR-664    | 24.9 | 25.4 | 1.0  | 0.881 |
| hsa-miR-665    | 27.6 | 31.1 | 3.2  | 1.000 |
| hsa-miR-668    | 34.2 | 33.2 | 0.4  | 0.766 |
| hsa-miR-671-3p | 31.9 | 32.7 | 2.2  | 0.428 |
| hsa-miR-672    | 34.6 | 30.1 | 0.0  | 1.000 |
| hsa-miR-7-2#   | 34.0 | 33.0 | 0.3  | 1.000 |
| hsa-miR-708    | 28.4 | 28.5 | 1.2  | 0.640 |
| hsa-miR-720    | 19.4 | 20.6 | 1.6  | 0.720 |
| hsa-miR-744    | 28.5 | 29.4 | 2.0  | 0.486 |
| hsa-miR-744#   | 31.1 | 31.9 | 1.8  | 1.000 |
| hsa-miR-758    | 31.5 | 33.1 | 2.7  | 0.206 |
| hsa-miR-766    | 26.9 | 27.5 | 1.1  | 0.970 |
| hsa-miR-769-5p | 29.2 | 31.4 | 3.2  | 0.517 |
| hsa-miR-770-5p | 27.5 | 27.1 | 0.5  | 0.350 |
| hsa-miR-874    | 29.6 | 30.5 | 2.0  | 0.276 |
| hsa-miR-885-5p | 31.6 | 29.2 | 0.1  | 0.273 |
| hsa-miR-886-3p | 26.6 | 27.6 | 2.1  | 0.853 |
| hsa-miR-886-5p | 23.5 | 23.8 | 1.2  | 0.923 |
| hsa-miR-887    | 34.5 | 33.1 | 0.4  | 1.000 |
| hsa-miR-888    | 32.3 | 30.3 | 0.7  | 1.000 |
| hsa-miR-889    | 31.2 | 29.2 | 0.4  | 0.220 |
| hsa-miR-891a   | 31.4 | 31.0 | 2.0  | 1.000 |
| hsa-miR-9      | 30.9 | 24.8 | 0.0  | 0.423 |
| hsa-miR-922    | 30.7 | 34.1 | 8.6  | 1.000 |
| hsa-miR-92a    | 26.1 | 26.2 | 1.1  | 0.505 |
| hsa-miR-92b#   | 31.6 | 31.7 | 0.5  | 0.552 |
| hsa-miR-93#    | 26.2 | 26.6 | 0.9  | 0.936 |



|  |                |      |      |      |       |
|--|----------------|------|------|------|-------|
|  | hsa-miR-935    | 30.1 | 32.1 | 3.0  | 0.564 |
|  | hsa-miR-939    | 34.4 | 29.6 | 0.0  | 1.000 |
|  | hsa-miR-941    | 31.1 | 30.1 | 0.5  | 1.000 |
|  | hsa-miR-942    | 30.4 | 30.8 | 1.0  | 0.801 |
|  | hsa-miR-95     | 31.6 | 30.9 | 1.1  | 0.719 |
|  | hsa-miR-98     | 22.4 | 28.4 | 68.3 | 0.391 |
|  | hsa-miR-99a-5p | 20.8 | 22.4 | 3.1  | 0.100 |
|  | hsa-miR-99b    | 24.8 | 25.4 | 1.6  | 0.478 |
|  | hsa-miR-99b#   | 28.2 | 26.3 | 0.2  | 0.246 |
|  | RNU44          | 31.3 | 30.3 | 0.5  | 0.321 |
|  | RNU48          | 27.4 | 26.3 | 0.5  | 0.345 |
|  | U6 snRNA       | 22.8 | 20.1 | 0.1  | 0.266 |

MicroRNAs detected in cEVs and PDGF-EVs (Ct<35): Ct, RQ (PDGF-EVs vs. cEVs) and p value are indicated. In blue column are present miRNAs expressed exclusively in PDGF-EVs. In rose column are present miRNAs exclusively expressed in cEVs. In bold – miRNAs selected for bioinformatic analysis.

Supplementary Figure S3. EV expression of MALAT1 or five selected miRNAs confirmed by Real-time PCR.

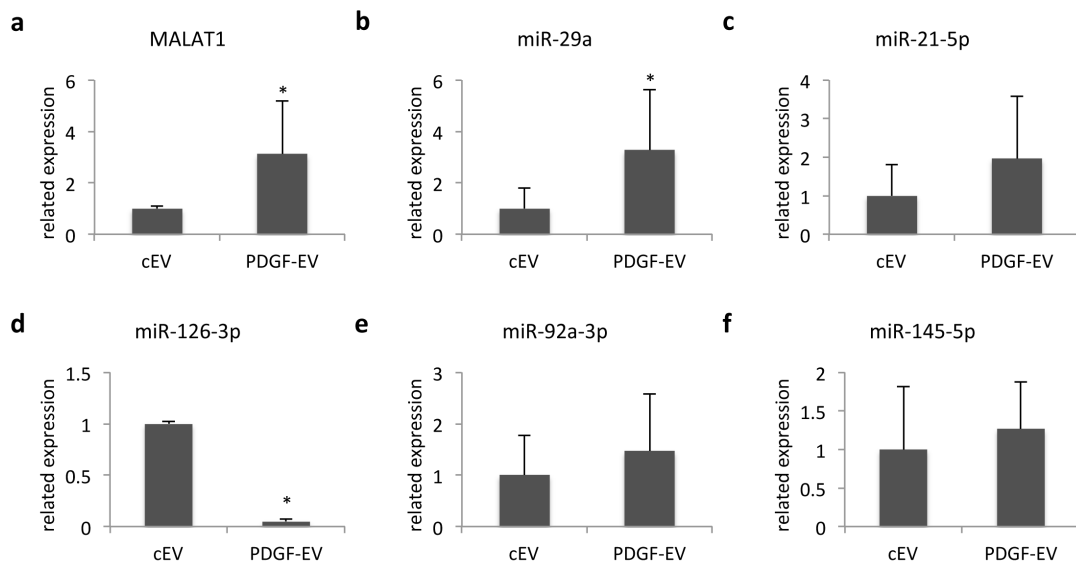

Supplementary Figure S3. EV expression of MALAT1 or five selected miRNAs confirmed by Real-time PCR. Diagrams of PCR analysis of RNA content of EVs: (a) expression of MALAT1; (b) expression of miR-29a; (c) expression of miR-21-5p; (d) expression of miR-126-3p; (e) expression of miR-92a-3p; (f) expression of miR-145-5p. \* - p<0.05 vs. cEV, n=4.

Supplementary table 3. KEGG pathways overrepresented by cEV or PDGF-EV miRNAs.

| PDGF-EVs                                |        |         | cEVs                                                       |        |         |
|-----------------------------------------|--------|---------|------------------------------------------------------------|--------|---------|
| KEGG pathway                            | #genes | #miRNAs | KEGG pathway                                               | #genes | #miRNAs |
| Hepatitis B                             | 40     | 8       | Proteoglycans in cancer                                    | 37     | 7       |
| Prostate cancer                         | 29     | 8       | Hippo signaling pathway                                    | 28     | 7       |
| Pathways in cancer                      | 80     | 8       | Lysine degradation                                         | 12     | 7       |
| Epstein-Barr virus infection            | 47     | 8       | Cell cycle                                                 | 34     | 7       |
| HTLV-I infection                        | 53     | 8       | Glioma                                                     | 17     | 7       |
| Insulin signaling pathway               | 33     | 8       | Chronic myeloid leukemia                                   | 19     | 7       |
| Estrogen signaling pathway              | 24     | 7       | p53 signaling pathway                                      | 20     | 7       |
| Chronic myeloid leukemia                | 20     | 7       | Bladder cancer                                             | 13     | 7       |
| FoxO signaling pathway                  | 34     | 7       | Small cell lung cancer                                     | 22     | 7       |
| Melanoma                                | 18     | 7       | Pathways in cancer                                         | 63     | 7       |
| Proteoglycans in cancer                 | 48     | 6       | Melanoma                                                   | 18     | 7       |
| Adherens junction                       | 22     | 6       | Hepatitis B                                                | 30     | 7       |
| Hippo signaling pathway                 | 37     | 6       | RNA transport                                              | 32     | 7       |
| Viral carcinogenesis                    | 47     | 6       | Transcriptional misregulation in cancer                    | 28     | 7       |
| <b>TGF-beta signaling pathway</b>       | 21     | 6       | Endometrial cancer                                         | 13     | 7       |
| Shigellosis                             | 21     | 6       | Acute myeloid leukemia                                     | 15     | 7       |
| Cell cycle                              | 35     | 6       | Prostate cancer                                            | 22     | 7       |
| p53 signaling pathway                   | 21     | 6       | HTLV-I infection                                           | 46     | 7       |
| <b>TNF signaling pathway</b>            | 28     | 6       | Non-small cell lung cancer                                 | 14     | 7       |
| Bacterial invasion of epithelial cells  | 19     | 6       | Pancreatic cancer                                          | 16     | 7       |
| Progesterone-mediated oocyte maturation | 24     | 6       | Viral carcinogenesis                                       | 36     | 7       |
| NOD-like receptor signaling pathway     | 17     | 6       | Focal adhesion                                             | 38     | 7       |
| Glioma                                  | 16     | 6       | Ubiquitin mediated proteolysis                             | 24     | 7       |
| Endometrial cancer                      | 14     | 6       | Endocytosis                                                | 33     | 7       |
| Small cell lung cancer                  | 22     | 5       | Thyroid cancer                                             | 13     | 6       |
| Oocyte meiosis                          | 29     | 4       | Adherens junction                                          | 16     | 6       |
| Long-term depression                    | 14     | 4       | Oocyte meiosis                                             | 25     | 6       |
| Bladder cancer                          | 14     | 4       | Renal cell carcinoma                                       | 17     | 6       |
| Fatty acid degradation                  | 6      | 1       | Epstein-Barr virus infection                               | 35     | 6       |
|                                         |        |         | Protein processing in endoplasmic reticulum                | 29     | 6       |
|                                         |        |         | Central carbon metabolism in cancer                        | 17     | 5       |
|                                         |        |         | Neurotrophin signaling pathway                             | 24     | 5       |
|                                         |        |         | Bacterial invasion of epithelial cells                     | 16     | 5       |
|                                         |        |         | Prion diseases                                             | 6      | 4       |
|                                         |        |         | Fatty acid metabolism                                      | 5      | 4       |
|                                         |        |         | Base excision repair                                       | 7      | 4       |
|                                         |        |         | Glycosaminoglycan biosynthesis - heparan sulfate / heparin | 5      | 4       |
|                                         |        |         | Shigellosis                                                | 15     | 4       |
|                                         |        |         | Nucleotide excision repair                                 | 10     | 4       |
|                                         |        |         | Fatty acid biosynthesis                                    | 2      | 2       |
|                                         |        |         | Fatty acid elongation                                      | 2      | 2       |

Bioinformatic analysis of miRNAs carried by cEVs or PDGF-EVs performed by Diana tools mirPath V3 revealed statistically confirmed ( $p < 0.05$ ) KEGG pathways, which could be regulated by the selected miRNAs (see Supplementary Table S2, in bold): in blue column are present KEGG pathways overrepresented for PDGF-EV miRNAs, in rose column – KEGG pathways overrepresented for cEV miRNAs. Inflammation related pathways “TGF-beta signaling pathway” and “TNF signaling pathway” are present only in PDGF-EV group.
